# Supplementary material
Source: publisher site journal article supplement (https://www.dovepress.com/article/484561)
Supplement: Supplementary file 1 [file get_supplementary_file.php]

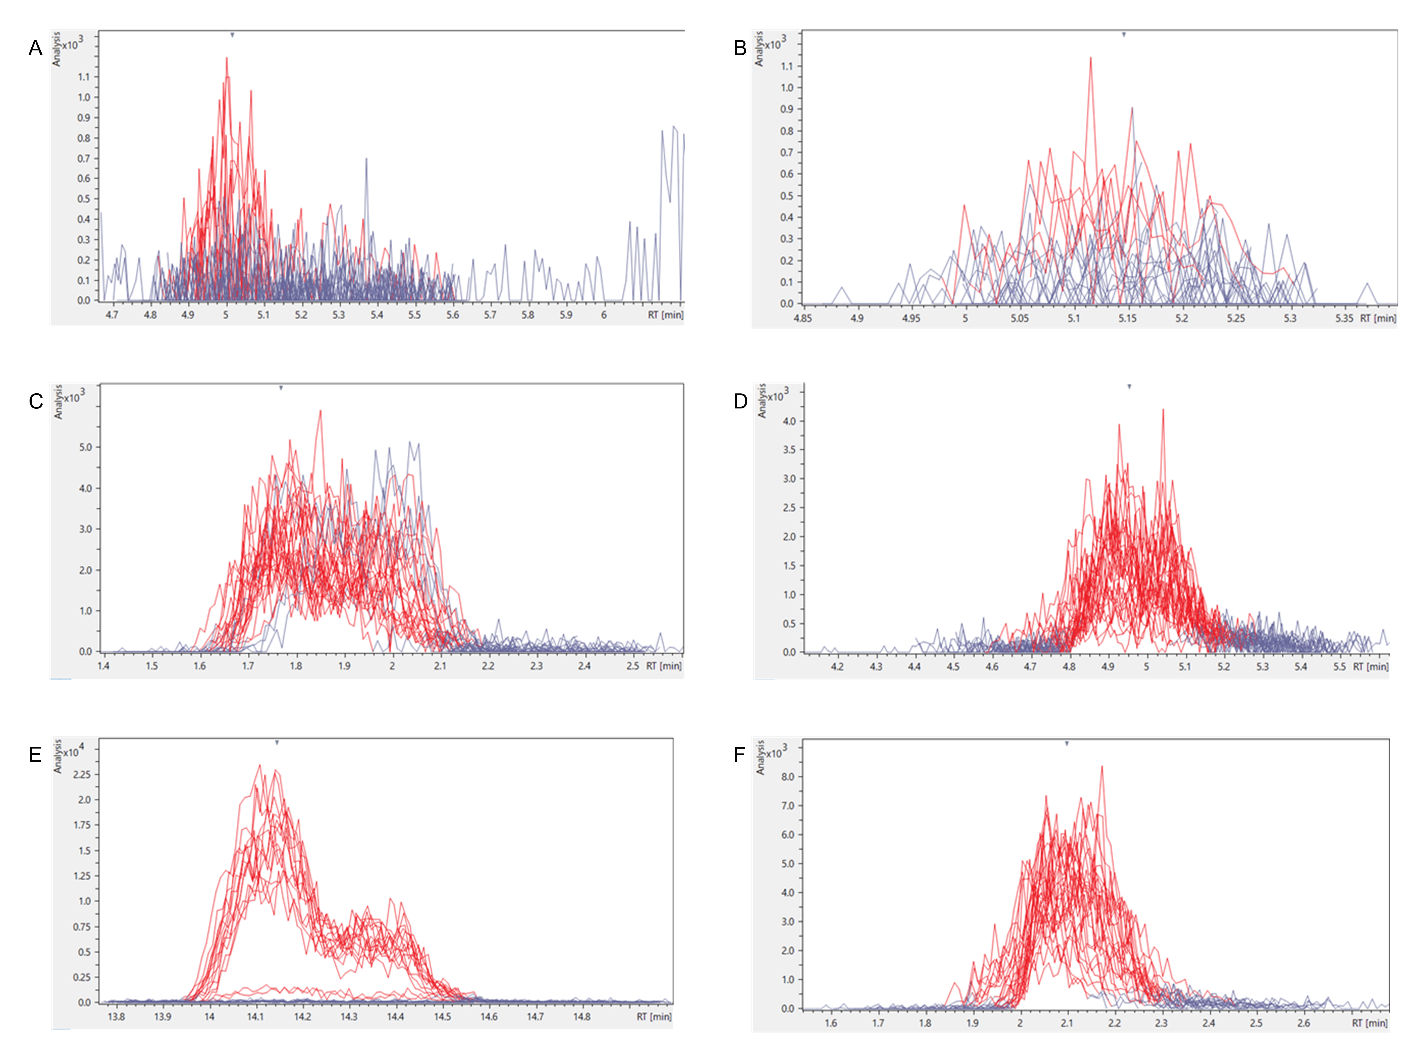


**Supplementary Figure 1: Representative chromatograms from the metabolomics analysis of amlodipine-treated and control NSCLC A549 cells.** Panels (A-F) display chromatographic peaks corresponding to specific metabolites identified in the metabolomics analysis. The following metabolites are highlighted: (A) 2'-Deoxyguanosine 5'-monophosphate, (B) Citramalic acid, (C) L-Acetylcarnitine, (D) L-Glutamic acid, (E) L-Proline, and (F) Niacinamide. The x-axis represents retention time (RT, in minutes), while the y-axis represents relative intensity.
